# Supplementary material for: Efficient reduction of CO2 and inhibition of hydrogen precipitation by polyoxometalate photocatalyst modified with the metal Mn
Source: Royal Society of Chemistry journal article supplement (doi:10.1039/d4nr00097h), 2024-01-01
Supplement: d4nr00097h1.pdf [file d4nr00097h1.pdf]

## Supporting information

# Efficient reduction of CO<sub>2</sub> and inhibition of hydrogen precipitation by polymetallic oxalate photocatalysts modified with the metal Mn

Guifeng Li <sup>a</sup>, Yulan Gu <sup>a</sup>, Rui Ren<sup>a</sup>, Sitan Li<sup>a,\*</sup>, Houen Zhu <sup>a</sup>, Dongdong Xue<sup>a</sup>, Xiangyi Kong <sup>a</sup>, Ziyi Zheng <sup>a</sup>, Nuo Liu <sup>a</sup>, Bei Li<sup>b,\*</sup> and Jiangwei Zhang<sup>a,\*</sup>

<sup>a</sup>Science Center of Energy Material and Chemistry; College of Chemistry and Chemical Engineering, Inner Mongolia University Hohhot 010021, P. R. China

E-mail: [zjw11@tsinghua.org.cn](mailto:zjw11@tsinghua.org.cn); [jwz@imu.edu.cn](mailto:jwz@imu.edu.cn)

<sup>b</sup>Cancer Centre and Institute of Translational Medicine, Faculty of Health Sciences, MoE Frontiers Science Center for Precision Oncology, University of Macau, Macau SAR 999078, China.

E-mail: [beili@um.edu.mo](mailto:beili@um.edu.mo)

|                                      | Reduce<br>d Chi-<br>square<br>( $\chi_v^2$ ) | R-<br>factor<br>(%) | amp/ $S_0^2$     | $N_{(V-O \text{ path})}$    | $R_{(V-O \text{ path})}$<br>(Å)    | $\sigma^2_{(V-O \text{ path})}$<br>( $10^{-3}\text{Å}^2$ )    | $\Delta E_0$<br>(eV) |
|--------------------------------------|----------------------------------------------|---------------------|------------------|-----------------------------|------------------------------------|---------------------------------------------------------------|----------------------|
| V<br>Mn <sub>6</sub> V <sub>12</sub> | 376.61                                       | 0.0478              | 0.86 +/-<br>0.12 | 5                           | 1.722±<br>0.031                    | 2.4+/-1.1                                                     | 2.41+/<br>-1.24      |
|                                      |                                              |                     | amp/ $S_0^2$     | $N_{(V-O-B \text{ path})}$  | $R_{(V-O-B \text{ path})}$<br>(Å)  | $\sigma^2_{(V-O-B \text{ path})}$<br>( $10^{-3}\text{Å}^2$ )  | $\Delta E_0$<br>(eV) |
|                                      |                                              |                     | 0.98 +/-<br>0.11 | 4                           | 3.218±<br>0.088                    | 2.6+/-1.1                                                     | 2.32+/<br>-1.45      |
|                                      |                                              |                     | amp/ $S_0^2$     | $N_{(V-O-V \text{ path})}$  | $R_{(V-O-V \text{ path})}$<br>(Å)  | $\sigma^2_{(V-O-V \text{ path})}$<br>( $10^{-3}\text{Å}^2$ )  | $\Delta E_0$<br>(eV) |
|                                      |                                              |                     | 0.91 +/-<br>0.12 | 2                           | 3.381 ±<br>0.072                   | 2.1+/-0.9                                                     | 2.11+/<br>-1.09      |
| Mn                                   | 478.94                                       | 0.0116              | 0.81 +/-<br>0.06 | 4                           | 2.101 ±<br>0.048                   | 2.5+/-1.2                                                     | 2.16+/<br>-1.33      |
|                                      |                                              |                     | amp/ $S_0^2$     | $N_{(Mn-C \text{ path})}$   | $R_{(Mn-C \text{ path})}$<br>(Å)   | $\sigma^2_{(Mn-C \text{ path})}$<br>( $10^{-3}\text{Å}^2$ )   | $\Delta E_0$<br>(eV) |
|                                      |                                              |                     | 0.88 +/-<br>0.08 | 2                           | 2.265±<br>0.032                    | 2.1+/-0.9                                                     | 2.56+/<br>-1.21      |
|                                      |                                              |                     | amp/ $S_0^2$     | $N_{(Mn-O-B \text{ path})}$ | $R_{(Mn-O-B \text{ path})}$<br>(Å) | $\sigma^2_{(Mn-O-B \text{ path})}$<br>( $10^{-3}\text{Å}^2$ ) | $\Delta E_0$<br>(eV) |

|  |  |  |                                  |                            |                                    |                                                                               |                         |
|--|--|--|----------------------------------|----------------------------|------------------------------------|-------------------------------------------------------------------------------|-------------------------|
|  |  |  |                                  | (Å)                        | (10 <sup>-3</sup> Å <sup>2</sup> ) | (eV)                                                                          |                         |
|  |  |  | 0.93 +/-<br>0.12                 | 1                          | 3.275±<br>0.061                    | 3.2+/-1.4                                                                     | 2.78+/<br>-1.38         |
|  |  |  | amp/ S <sub>0</sub> <sup>2</sup> | N <sub>(Mn-N-C path)</sub> | R <sub>(Mn-N-C path)</sub><br>(Å)  | σ <sup>2</sup> <sub>(Mn-N-C path)</sub><br>(10 <sup>-3</sup> Å <sup>2</sup> ) | ΔE <sub>0</sub><br>(eV) |
|  |  |  | 0.94 +/-<br>0.11                 | 4                          | 3.327±<br>0.038                    | 3.3+/-1.1                                                                     | 2.81+/<br>-1.45         |

Table S1 : Fitting parameters of Mn<sub>6</sub>V<sub>12</sub>
